# Supplementary material for: High-performance, ultra-flexible and transparent embedded metallic mesh electrodes by selective electrodeposition for all-solid-state supercapacitor applications
Source: Royal Society of Chemistry journal article supplement (doi:10.1039/c7ta01947e), 2017-01-01
Supplement: c7ta01947e1.pdf [file c7ta01947e1.pdf]

## Supporting Information

# High-Performance, Ultra-Flexible and Transparent Embedded Metallic Mesh Electrodes by Selective Electrodeposition for All-solid-state Supercapacitor Applications

Yan-Hua Liu<sup>1</sup>, Jian-Long Xu<sup>2\*</sup>, Su Shen<sup>1\*</sup>, Xin-Lei Cai<sup>2</sup>, Lin-Sen Chen<sup>1</sup>, and Sui-Dong Wang<sup>2\*</sup>

<sup>1</sup>College of Physics, Optoelectronics and Energy, Key Lab of Advanced Optical Manufacturing Technologies of Jiangsu Province & Key Lab of Modern Optical Technologies of Education Ministry of China, Soochow University, Suzhou, Jiangsu 215006, P R China

<sup>2</sup>Institute of Functional Nano & Soft Materials (FUNSOM), Jiangsu Key Laboratory for Carbon-Based Functional Materials & Devices, Soochow University, Suzhou, Jiangsu 215123, P R China

Address all correspondence to the author. \*Email: xujianlong@suda.edu.cn; shen.su@gmail.com; wangsd@suda.edu.cn

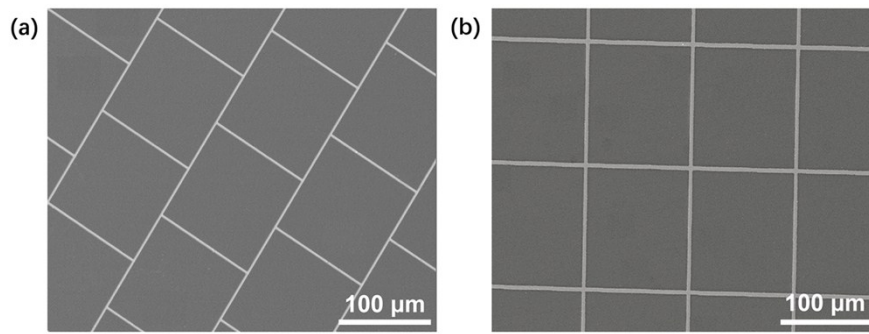

Fig. S1 Top-view SEM images of embedded Ni mesh TCEs with (a) brick wall and (b) rectangle arrangements.

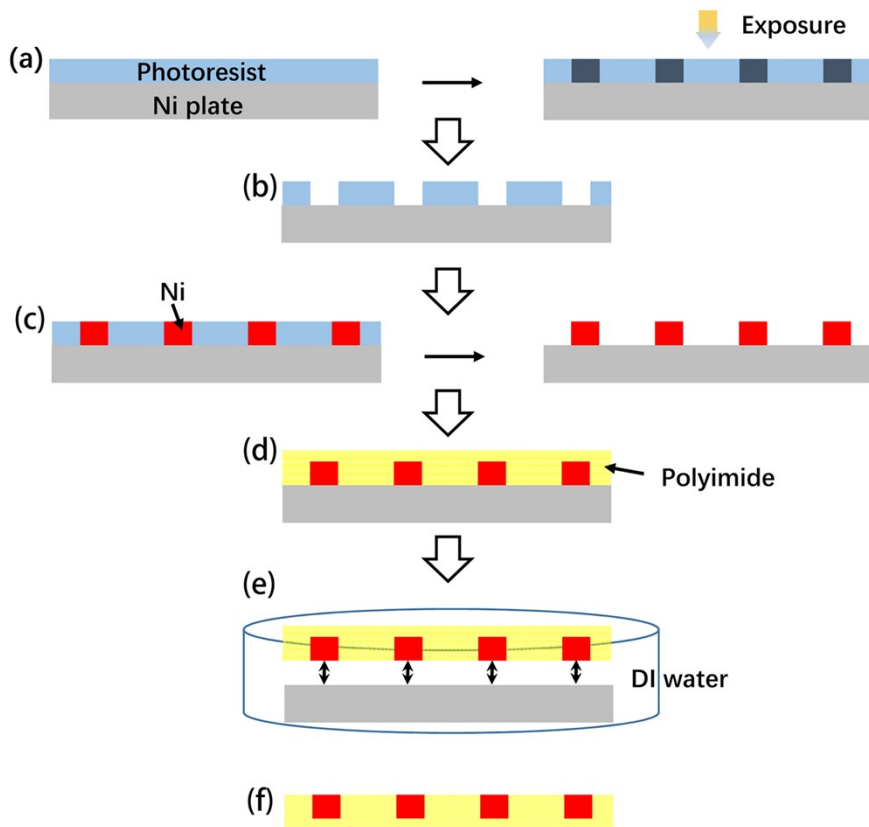

Fig. S2 Schematic illustration of the fabrication procedure of the embedded Ni mesh TCEs on ultra-thin flexible polyimide (PI): (a) Spin-coating photoresist on Ni plates and generate metallic mesh patterns by laser direct writing system, (b) developing, (c) electrodepositing Ni into the patterned micro trenches and remove the photoresist, (d) fabricate PI films on Ni mesh by solution process, (e) release the embedded Ni mesh TCEs/PI from Ni plate by immersing it on DI water and (f) obtain the embedded Ni mesh TCEs on PI.

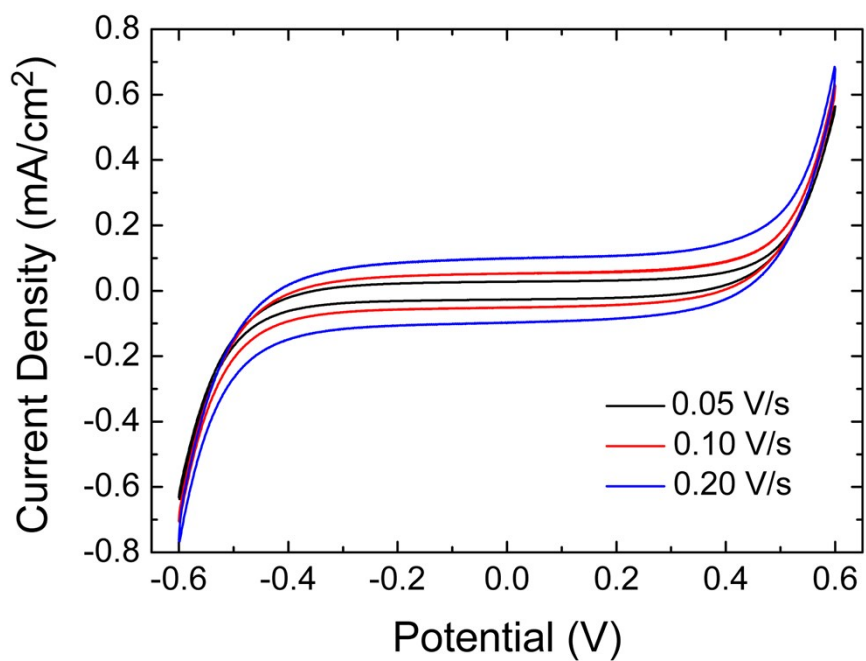

Fig. S3 CV curves of the supercapacitor device at small scan rates of 0.05, 0.1 and 0.2 V/s

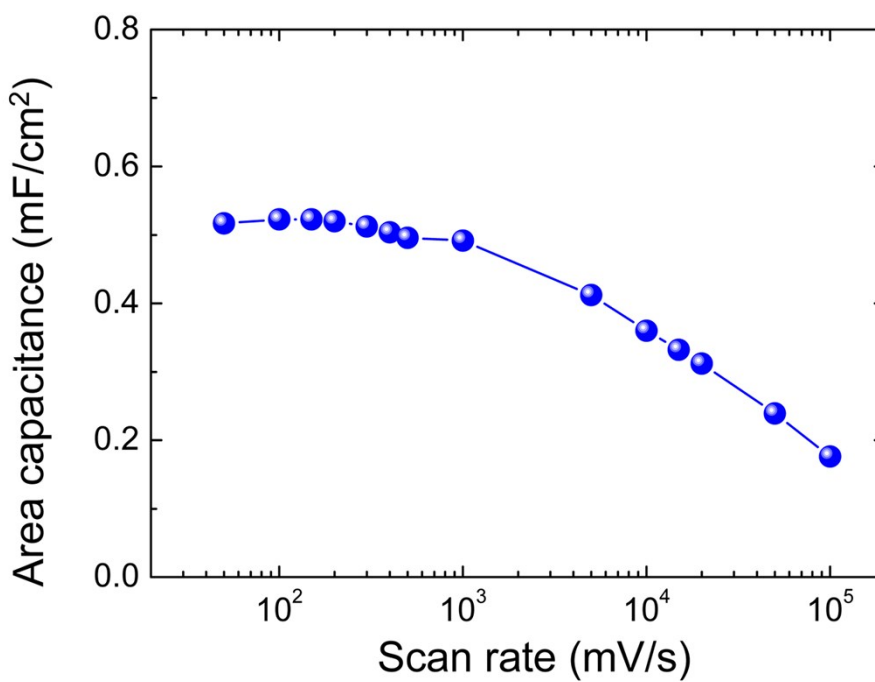

Fig. S4 Area capacitance of the supercapacitor device measured as a function of scan rate.
